# Supplementary material for: Gain-of-Signal Assays for Probing Inhibition of SARS-CoV-2 Mpro/3CLpro in Living Cells
Source: PubMed Central journal article supplement (PMC9239272; doi:10.1128/mbio.00784-22), 2022-04-26

a

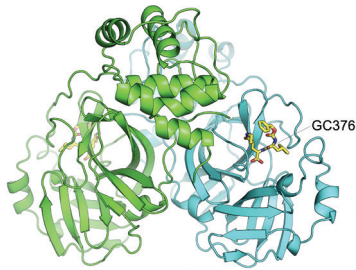

b

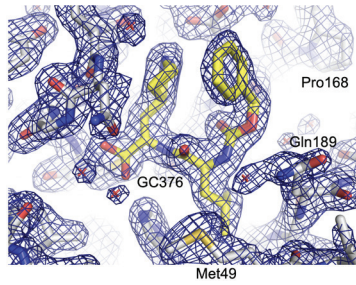

c

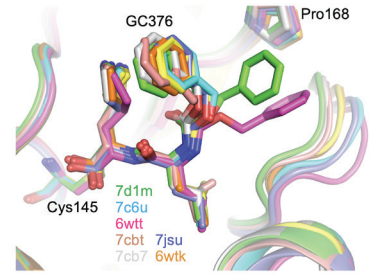

d

M49

```

SARS2 SCFRKMAHPSCKVECCMVQVTCGTTLNGLWLDLVVYCPRHVICSEMLNENMEDLLIRKSNENSLMOAGN...VQIRVICHSONCVLKKVDTANEKTPKYKIVRIQPGOTHSVLAC 117
SARS2 SCFRKMAHPSCKVECCMVQVTCGTTLNGLWLDLVVYCPRHVICSEMLNENMEDLLIRKSNENSLMOAGN...VQIRVICHSONCVLKKVDTANEKTPKYKIVRIQPGOTHSVLAC 117
HKU9 ACGLTRMAHPSCLVBPCLVKNVYCSMLNLNGIWLIDNFIICPRHVICSRDELANDPPIISMRAAYDHHSONG...HNIRVICHTEGSLIKLIVDNNKTPAHSIRVSTQAMSLILAC 117
MHV SCIVRVAHSTKVEPCLVSVTICNMNLGLWLDLVVYCPRHVICSSALMTDIPFNICRVTSDDCMHSGR...MSTIVMSYQCCQVIVTLDQNNPKHSQVVRREPTVLA 117
MERS SCLMNSHESDVEACVQVTCGSMNLGLWLDLVVYCPRHVICPADQLSDENPDALLISIMNHSQORHIGAPANRVAHACQITLKLIVDANISSTFAHTTIVKREASVILAC 120
229E ACLKMAQPSGCVKCVVRRVYCGNTVNLGLWLDLVVYCPRHVICIASN.TTTSATVDHEYSIMRILNNSISLISGT...AFICVVCATVHCVTIKIKVQTNMHTPRHSRITLKEEGNLLAC 116
NL63 SCLKMAQPSGCVKCVVRRVYCGSTVNLGLWLDLVVYCPRHVICIASN.TTTLIDVDHAYSTRILNNSISLISGT...VFLCVVSVTLHC SVIRIKVQSNVHTPRHSRITLKEEGNLLAC 116
IBV ACFRKLVSSESAVEKCIIVSVSRGNLNLGLWLDLVVYCPRHVICIASN.TTTSATVDHEYSIMRILNNSISLISGT...VFLCVVSVTLHC SVIRIKVQSNVHTPRHSRITLKEEGNLLAC 115
    
```

P168

```

SARS2 VNCSESGVYQCAMRPNFTIKGSFINGSCGSGVGNIDY.DCVSFCYMHMEIPICVFACTDLECKFYCFVDRQTACAAGTDTTITVNVLAWLAAVINGDR.....WFINRFTTLLNDF 230
SARS1 VNCSESGVYQCAMRPNFTIKGSFINGSCGSGVGNIDY.DCVSFCYMHMEIPICVFACTDLECKFYCFVDRQTACAAGTDTTITVNVLAWLAAVINGDR.....WFINRFTTLLNDF 230
HKU9 VDCPLGAVYTCITLRSKCHMRASFCGSCGSECFVHNG.KEVCFYDHLLELPCVHAGDDESQVYCFVDRQVFLAAPHCTITVNVLAWLAAVINGDR.....WFINRFTTLLNDF 230
MHV VNCSESGVYQCAMRPNFTIKGSFINGSCGSGVGNIDY.DCVSFCYMHMEIPICVFACTDLECKFYCFVDRQTACAAGTDTTITVNVLAWLAAVINGDR.....WFINRFTTLLNDF 230
MERS VNCSESGVYQCAMRPNFTIKGSFINGSCGSGVGNIDY.DCVSFCYMHMEIPICVFACTDLECKFYCFVDRQTACAAGTDTTITVNVLAWLAAVINGDR.....WFINRFTTLLNDF 233
229E VDCCAQCFVGNMRENIWIKGSFINGSCGSGVGNIDY.DCVSFCYMHMEIPICVFACTDLECKFYCFVDRQVFLAAPHCTITVNVLAWLAAVINGDR.....WFINRFTTLLNDF 229
NL63 VECIASVFCVGNIRNFTIKGSFINGSCGSGVGNIDY.DCVSFCYMHMEIPICVFACTDLECKFYCFVDRQVFLAAPHCTITVNVLAWLAAVINGDR.....WFINRFTTLLNDF 230
IBV VCCTVICLVPVIMRNSCHIRASFTIACACGSGVGNIEK.GVNVNFCYMHMEIPICVFACTDLECKFYCFVDRQVFLAAPHCTITVNVLAWLAAVINGDR.....WFINRFTTLLNDF 234
    
```

Q189

```

SARS2 NLVVMKYNYEPLTQDHVDILGPTSAQTCIAVLDMCASLKEFLQNGMNCRTILGSALELEDFTEFDVVRCCSGVTHC 306
SARS1 NLVVMKYNYEPLTQDHVDILGPTSAQTCIAVLDMCASLKEFLQNGMNCRTILGSALELEDFTEFDVVRCCSGVTHC 306
HKU9 NCVVMKYNYEPLTQDHVDILGPTSAQTCIAVLDMCASLKEFLQNGMNCRTILGSALELEDFTEFDVVRCCSGVTHC 306
MHV VVMVMKYNYEPLTQDHVDILGPTSAQTCIAVLDMCASLKEFLQNGMNCRTILGSALELEDFTEFDVVRCCSGVTHC 306
MERS NRRLLANQTEFFVCT..OSVDMLAVKTCVAVLEQLYAIQVYTTGQCKKILGYSSEDEFTEFLAEVVKMCGVNLG 302
229E NRRLLANQTEFFVCT..DAFSLAAKTCVAVLEQLYAIQVYTTGQCKKILGYSSEDEFTEFLAEVVKMCGVNLG 302
NL63 NRRLLANQTEFFVCT..ECYSILAAKTCVAVLEQLYAIQVYTTGQCKKILGYSSEDEFTEFLAEVVKMCGVNLG 303
IBV NRRLLANQTEFFVCT..TAITKLSAITCVDVCKLRTIMVKS.AQWSDPILCQYNEDEFTEFLAEVVKMCGVNLG 307
    
```

Legend:   
  non conserved   
  ≥ 50% conserved

e

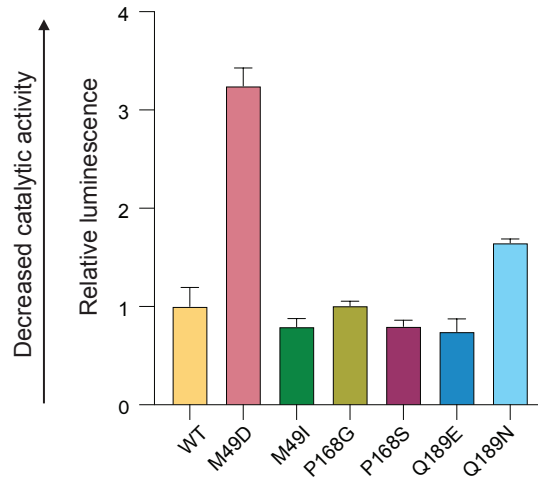

Supplement: mbio.00784-22-s0003.pdf [file mbio.00784-22-s0003.pdf]
