# Supplementary material for: Gain-of-Signal Assays for Probing Inhibition of SARS-CoV-2 Mpro/3CLpro in Living Cells
Source: PubMed Central journal article supplement (PMC9239272; doi:10.1128/mbio.00784-22), 2022-04-26

**a**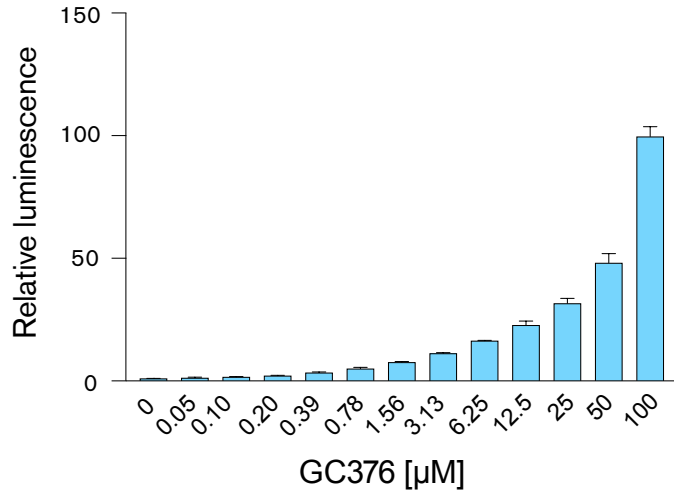**b**

| Concentration [ $\mu\text{M}$ ] | Mean S:B |
|---------------------------------|----------|
| 0                               | 1        |
| 0.05                            | 1.3      |
| 0.10                            | 1.7      |
| 0.20                            | 2.2      |
| 0.39                            | 3.4      |
| 0.78                            | 5.0      |
| 1.56                            | 7.7      |
| 3.13                            | 11.3     |
| 6.25                            | 16.4     |
| 12.5                            | 22.8     |
| 25                              | 31.7     |
| 50                              | 48.2     |
| 100                             | 99.7     |

**c**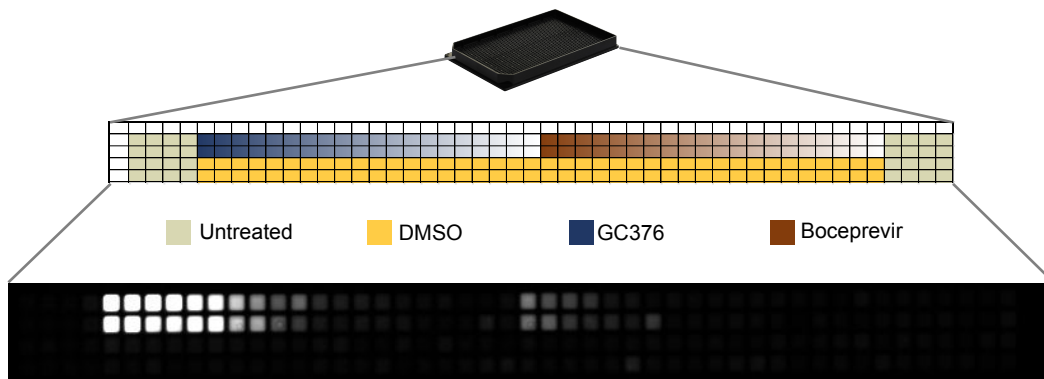**d**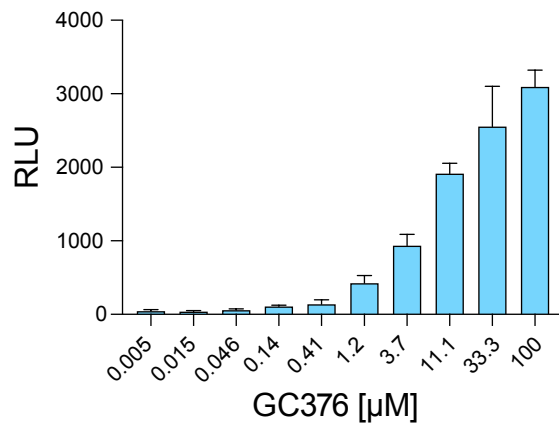**e**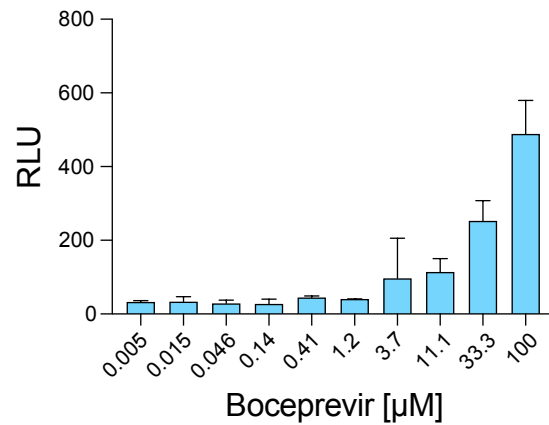

Supplement: mbio.00784-22-s0002.pdf [file mbio.00784-22-s0002.pdf]
