# Supplementary material for: Gain-of-Signal Assays for Probing Inhibition of SARS-CoV-2 Mpro/3CLpro in Living Cells
Source: PubMed Central journal article supplement (PMC9239272; doi:10.1128/mbio.00784-22), 2022-04-26

**a**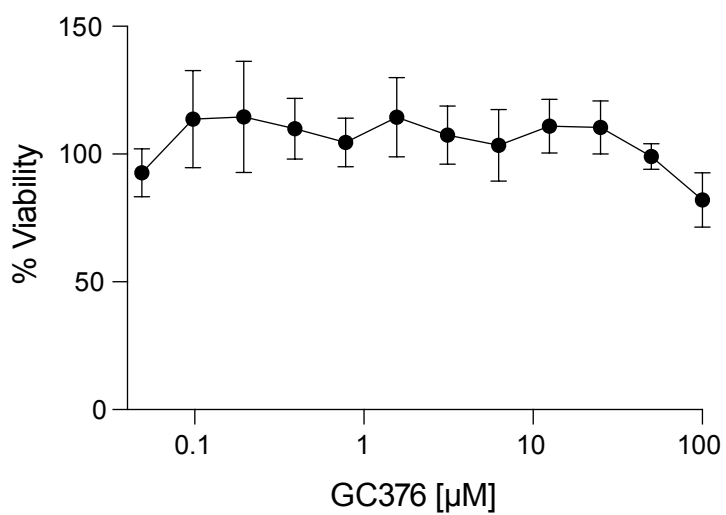**b**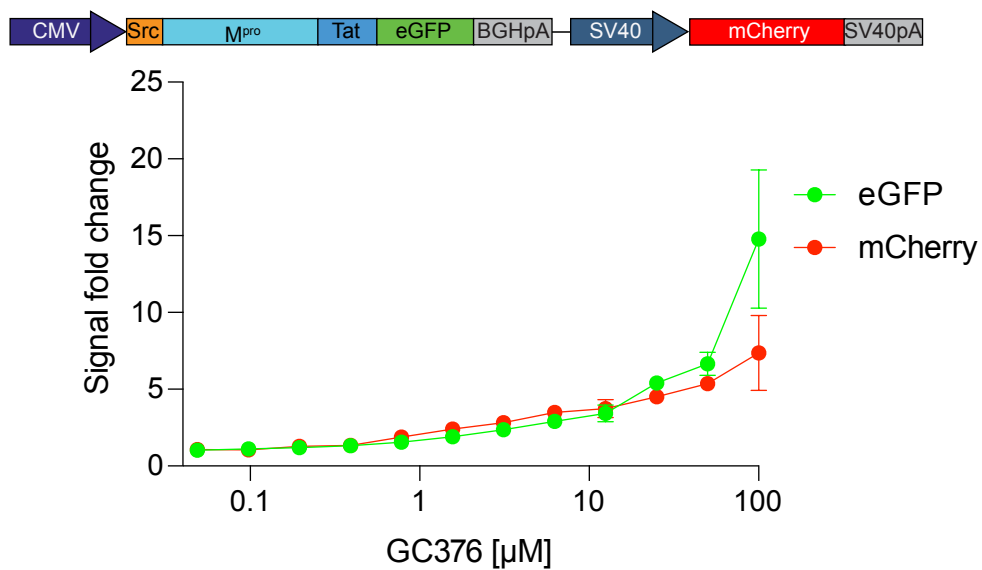**c**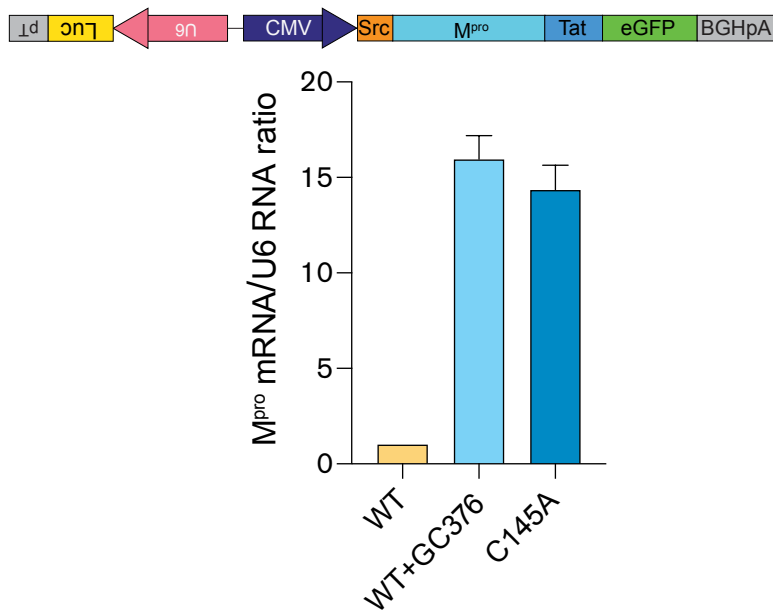

Supplement: mbio.00784-22-s0005.pdf [file mbio.00784-22-s0005.pdf]
