# Supplementary material for: Gain-of-Signal Assays for Probing Inhibition of SARS-CoV-2 Mpro/3CLpro in Living Cells
Source: PubMed Central journal article supplement (PMC9239272; doi:10.1128/mbio.00784-22), 2022-04-26
Supplement: mbio.00784-22-s0006.pdf [file mbio.00784-22-s0006.pdf]

a

| Residue number | Domain description                                                   | GenBank accession number (matching residue numbers) |
|----------------|----------------------------------------------------------------------|-----------------------------------------------------|
| 1-10           | Src myristoylation motif                                             | AAD13831.1 (1-10)                                   |
| 11-15          | Linker                                                               | -                                                   |
| 16-337         | SARS2 M <sup>Pro</sup> with cognate N- and C-terminal cleavage sites | QNO91750.1 (3256-3577)                              |
| 338-346        | Linker                                                               | -                                                   |
| 347-418        | HIV-1 Tat                                                            | ACD75161.1 (1-72)                                   |
| 419-424        | Linker                                                               | -                                                   |
| 425-663        | eGFP                                                                 | AAB02576.1 (1-239)                                  |

**Amino acid sequence:**

MGSSKSKPKDGGGSSITSVAVLQSGFRKMAFSPGKVEGCMVQVTCGTTTLNGLWLDVVYQCPRHVICTSEDMLNPNYEDLLIRKSNHNFLVQAGNVQ  
LRVIGHSMQNCVLLKLVDTANPKTPKYKRVRIQPGQTFVSVLACYNGSPSGVYQCAMPNFTIKGSFNLNGSCGVSFNFIDYDCVDFCYMHMELPTGV  
HAGTDLEGNFYGPFVDRQTAQAAGTDTTITVNVLAWLYAAVINGDRWFLNRFNTLLNDFNLVAMKYNIEPLTQDHWVDILGPLSAQTGIAVLDMCASL  
KELLQNGMNRITLGSALLEDEFPPFDVVRQCSGVTFQSAVKRTIKGTSGSGGMEPVDPRLEPWKHPGSQPKTACTNCYCKCCFHCQVCFITKA  
LGISYGRKKRRRPPQGSQTHQVLSLQKPGSIATMVSKEELFTGVVPILEVELDGDVNGHKFSVSGEGEGDATYGLTLKFICTTGKLPVPWPTL  
VTTLTYGVQCFSRYPDHMKQHDFFKSAMPEGYVQERTIFFKDDGNYKTRAEVKFEGDTLVNRIELKGI DFKE DGNILGHKLEYNNSHNHYIMADKO  
KNGIKVNFKIRHNIEDGSVQLADHYQQNTPIGDGPVLLPDNHLYLSTQSALS KDPNEKRDMVLEFVTAAGITLGMDELYK\*

b

**Nucleotide sequence:**

AAGCTTGCCACCATGGGCAGCAGTAAGAGTAAACCGAAAGATGGAGCGGTGGGTCACTATCACCTCAGCTGTTTTGCAGTCTGGTTTTAGGAAAA  
TGGCGTCCCCAGCGGTAAGTTGAAGGATGTATGGTCCAAGTAACTGTGGTACCCTACCTTAATGGGCTTTGGTTGGACGACGTAGTCTACTG  
CCCCGCACAGTAATCTGCACTAGTGAGGATATGCTTAATCCCAATTACGAAGACCTTTTGATTCGGAAATCCAATCACAACTCCTGGTCCAAGCG  
GGCAACGTCCAACCTCAGGGTTATTGGACATAGTATGCAGAATTGCGTACTGAAGCTCAAAGTCGATACTGCAAACCCCAAGACGCCCAAGTATAAAT  
TCGTCCGAATCCAACCCAGGCCAAACATTTTCCGTATTGGCTTGTCTATAATGGAAGCCCGAGCGGTGTCTACCAATGTGCAATGAGACCAAACCTTAC  
GATAAAGGGTTCAATTTGTAACGGCTCTTGGCGTTCCGTTGGTTTTAACATCGACTATGACTGTGTATCCTTTTGCTACATGCACCATAATGGAACCT  
CTTACCGGTGTCCACGCCGTTACAGATCTGGAAGGAAATTTCTACGGTCCGTTGTTGACCGGCAAACCGCGCAAGCGGCTGGAACCGCACACAACGA  
TTACAGTGAATGTGCTCGCGTGGCTGTACGCAGCAGTCATAAACGGAGACAGGTGGTTTCTGAACCGATTTACGACGACTCTCAATGACTTCAACCT  
TGTTGCGATGAAGTACAATTACGAGCCACTCACCCAGGACCATGTTGATATCCTGGGTCCCTCAGTGCCAGACAGGGATCGCAGTCTCGATATG  
TGCGCGTCACTGAAGGAGCTTCCAAAATGGAATGAATGGGCGGACCATACTTGGTTCGGCACTCCTCGAAGATGAATTTACTCCATTTGACGTGG  
TCAGACAATGCAGTGGGTCACTTCCAGAGTGCAGTGAAAAGAACAATCAAGGGTACC GGTCAGGGGCGAGGGGATGGAGCCAGTAGATCC  
TAGACTAGAGCCCTGGAAGCATCCAGGAAGTCAGCCTAAAACCTGCTTGTACCAATTGCTATTGTAAAAAGTGTGCTTTCAATGCCAAGTTTGTTC  
ATAACAAAAGCCTTAGGCATCTCCTATGGCAGGAAGAAGCGGAGACAGCGACGAAGACCTCCTCAAGGCAGTCAGACTCATCAAGTTTCTCTATCAA  
AGCAGCCGGGATCCATCGCCACCATGGTGAGCAAGGGCGAGGAGCTGTTACCGGGGTGGTGCCATCCTGGTCGAGCTGGACGGCGACGTAAACGG  
CCACAAGTTTACGGTGTCCGGCGAGGGCGAGGCGATGCCACCTACGGCAAGCTGACCTGAAGTTTCACTGCACCACCGGCAAGCTGCCCGTGCCC  
TGGCCACCCTCGTGACCACCCTGACCTACGGCGTGCAGTGTTCAGCCGCTACCCCGACCACATGAAGCAGCAGACTTCTTCAAGTCCGCCATGC  
CCGAAGGTACGTCCAGGAGCGACCATCTTCTCAAGGACGACGGCAACTACAAGACCCGCGCCGAGGTGAAGTTGAGGGCGACACCCTGGTGAA  
CCGCATCGAGCTGAAGGGCATCGACTTCAAGGAGGACGGCAACATCCTGGGGCACAAGCTGGAGTACAACATAACAGCCACAACGCTATATCATG  
GCCGACAAGCAGAAGAACGGCATCAAGGTGAACCTCAAGATCCGCCACAACATCGAGGACGGCAGCTGCAGCTCGCCGACCACTACCAGCAGAACA  
CCCCATCGGCGACGGCCCCGTGCTGCTGCCGACAACCCTACCTGAGCACCCAGTCCGCCCTGAGCAAAGACCCCAACGAGAAGCGGATCACAT  
GGTCTGTGGAGTTCGTGACCGCCCGGGATCACTCTCGGATGGACGAGTGTACAAGTAAAGCGGCCG
