# Supplementary material for: Gain-of-Signal Assays for Probing Inhibition of SARS-CoV-2 Mpro/3CLpro in Living Cells
Source: PubMed Central journal article supplement (PMC9239272; doi:10.1128/mbio.00784-22), 2022-04-26
Supplement: mbio.00784-22-s0007.pdf [file mbio.00784-22-s0007.pdf]

a

| Residue number | Domain description                                                   | GenBank accession number (matching residue numbers) |
|----------------|----------------------------------------------------------------------|-----------------------------------------------------|
| 1-10           | Src myristoylation motif                                             | AAD13831.1 (1-10)                                   |
| 11-15          | Linker                                                               | -                                                   |
| 16-337         | SARS2 M <sup>Pro</sup> with cognate N- and C-terminal cleavage sites | QNO91750.1 (3256-3577)                              |
| 338-346        | Linker                                                               | -                                                   |
| 347-418        | HIV-1 Tat                                                            | ACD75161.1 (1-72)                                   |
| 419-424        | Linker                                                               | -                                                   |
| 425-973        | Firefly Luciferase                                                   | EU754723.1 (2-550)                                  |

**Amino acid sequence:**

MGSSKSKPKDGGGSSITS<sup>AVL</sup>QSGFRKMAFPSPGKVEGCMVQVTCGTTTLNGLWLDVVYCPRHVICTSEDMLNPNYEDLLIRKSNHNFLVQAGNVQ  
LRVIGHSMQNCV<sup>LK</sup>LKVD<sup>TAN</sup>PKTPKYK<sup>FVRI</sup>QPGQ<sup>TS</sup>SVLACYNGSPSGVYQCAMRPNFTIKGSFLNGSCG<sup>SVGF</sup>NDYDCV<sup>SC</sup>FCYMHMELPTGV  
HAGTDLEGNFYGFV<sup>DR</sup>QTAQAAGTDTIT<sup>VN</sup>VLAWL<sup>YAAV</sup>INGDRWFLNRF<sup>TTL</sup>NDFNLVAMKYNYEPLTQ<sup>DH</sup>V<sup>DL</sup>GLPLSAQ<sup>TG</sup>IAVLD<sup>MC</sup>ASL  
KELLQNGMNGRTIL<sup>GS</sup>ALLEDEF<sup>TF</sup>PFV<sup>VR</sup>QCSG<sup>VT</sup>FQSAVKRTIKGTGSGGSGGMEPVD<sup>PR</sup>LEPWKHPGSQPKTACTN<sup>CY</sup>CKKCCFHCQ<sup>VC</sup>FITKA  
LGLSYGRKRRRQRRRPPQGSQ<sup>TH</sup>QVSLSKQPGSIATEDAKNIKKGPAPFYPLEDGTAGEQLHKAMKRYALVPGTIA<sup>FT</sup>DAHIEVNI<sup>TY</sup>AEYFEMSVR  
LAEAMKRYGLN<sup>TN</sup>HRI<sup>VV</sup>CS<sup>NS</sup>LQ<sup>FF</sup>MPV<sup>L</sup>GAL<sup>FI</sup>GVA<sup>VAP</sup>ANDI<sup>YNER</sup>EL<sup>NS</sup>MNI<sup>SQ</sup>PT<sup>VV</sup>FVSKKGLQKIL<sup>NV</sup>QK<sup>KL</sup>PIIQKI<sup>II</sup>IMDSK<sup>TD</sup>YQ  
GFQSMY<sup>TF</sup>V<sup>TS</sup>HL<sup>PP</sup>PGF<sup>NEY</sup>DFV<sup>PE</sup>SFDR<sup>DK</sup>TIALIM<sup>NS</sup>SG<sup>ST</sup>GLPK<sup>GVA</sup>LPH<sup>RT</sup>AC<sup>VR</sup>FSHARD<sup>PI</sup>FG<sup>NI</sup>I<sup>IP</sup>DTAIL<sup>SV</sup>VP<sup>FF</sup>HHG<sup>FG</sup>M<sup>FT</sup>TL<sup>GY</sup>L  
ICGFRV<sup>LM</sup>YR<sup>FE</sup>EEL<sup>FL</sup>RL<sup>SD</sup>YKI<sup>QS</sup>ALL<sup>VPT</sup>LF<sup>SFF</sup>AK<sup>ST</sup>LID<sup>KY</sup>DLS<sup>NL</sup>HEIASGGAP<sup>LS</sup>KEVGE<sup>AV</sup>AKR<sup>FHL</sup>PGIR<sup>QY</sup>GL<sup>TET</sup>TSAIL<sup>ITP</sup>  
EGDDKPGAVGK<sup>VV</sup>FF<sup>EAK</sup>V<sup>VD</sup>L<sup>DT</sup>GK<sup>TL</sup>GV<sup>NQ</sup>R<sup>GEL</sup>CV<sup>RG</sup>PM<sup>IS</sup>GV<sup>VNN</sup>PEAT<sup>NAL</sup>ID<sup>KD</sup>GW<sup>LH</sup>SG<sup>DI</sup>AY<sup>WDE</sup>DE<sup>HE</sup>FFI<sup>VDR</sup>L<sup>KSL</sup>I<sup>KY</sup>K<sup>GY</sup>Q<sup>VA</sup>  
PAELESILLQHPNIFDAGVAGL<sup>PDD</sup>DAGEL<sup>PA</sup>AV<sup>VV</sup>LE<sup>HG</sup>K<sup>TM</sup>TEKEIV<sup>DY</sup>VAS<sup>QV</sup>TTAK<sup>KL</sup>R<sup>GG</sup>V<sup>V</sup>F<sup>V</sup>DEV<sup>PK</sup>GL<sup>TG</sup>K<sup>L</sup>DARKIRE<sup>IL</sup>I<sup>KAK</sup>KG<sup>SK</sup>L\*

b

**Nucleotide sequence:**

AAGCTTGCACCATGGGGCAGCAGTAAGAGTAAACCGAAAGATGGAGCGGTGGGTCA<sup>TCT</sup>TATCACCTCAGCTGTTTTGCAGTCTGGTTTTAGGAAAA  
TGGCGTCCCCAGCGGTAAGTGAAGGATGTATGGTCCAAGTAACTGTGGTACCCTACCTTAATGGGCTTTGGTGGACGACGTAGTCTACTG  
CCCCCGACACGTAATCTGCAC<sup>TAG</sup>TGAGGATATGCTTAATCCCAAT<sup>TAC</sup>GAAGACCTTTTGATTCGGAAATCCAATCACA<sup>ACT</sup>TCCTGGTCCAAAGCG  
GGCAACGTCCA<sup>ACT</sup>CAGGGTTAT<sup>TGG</sup>CATAGTATGCGA<sup>ATT</sup>TGCGTACTGAAGCTCAAAGTCGATACTGCAACCCCAAGACGCCCAAGTATAAAT  
TCGTCCGAATCCAACCAAGCCAAACATTTCCGTAATTGGCTTGCATAAATGGAAGCCCCAGCGGTGTCTACCAATGTCAATGAGACCAAACTTAC  
GATAAAGGGTTCATTTCTGAACGGCTCTTGGCTTCCGTTGGTTTTAATCGACTATGACTGTGTATCCTTTTGCTACATGCACCATATGGAAGTCC  
CCTACCGGTGTCCACGCCGGTACAGATCTGGAAGGAAATTTCTACGGTCCGTTCTGTTGACCGGCAAAACCGCGCAAGCGGCTGGAACCGACACAACGA  
TTACAGTGAATGTCTCGCTGGCTGTACGCAGCAGTCATAAACGGAGACAGGTGGTTCTGAACCGATTTACGACGACTCTCAATGACTTCAACCT  
TGTTCCGATGAAGTACAAT<sup>TAC</sup>GAGCCTC<sup>AC</sup>CCAGACCATGTTGATATCCTGGTCCCTCAGTCCCAGACAGGGATCCGAGTCTCGATATG  
TGCGGCTACTGAAGGAGCTTCCAAAATGGAATGAATGGCGGACCATACTGGTTCGGCACTCCTCGAAGATGAATTTACTCCATTTGACGTGG  
TCAGACAATGCAGTGGGTCACTTCCAGAGTGCAGTGAAGAACAATCAAGGGTACCGGGTCAGGGGGCAGCGGAGGGATGGAGCCAGTAGATCC  
TAGACTAGAGCCTGGAAGCATCCAGGAAGTCAGCCTAAAAC<sup>TG</sup>CTTGTACCAAT<sup>TGT</sup>ATTTGTA<sup>AAA</sup>AGTGTGTCTTTCATTTGCCAAGTTTGTTC  
ATAACAAAAGCC<sup>T</sup>TAGGCATCTCCTATGGCAGGAAGAAGCGGAGACAGCGACGAAGACCTCCTCAAGGCAGTCAGACTCATCAAGTTTCTCTATCAA  
AGCAGCCGGGATCCATCGCCACCGAAGACGCCAAAACATAAAGAAAGGCCGGCGCCATTCATCCTCTAGAGGATGGAACCGCTGGAGAGCAACT  
GCATAAGGCTATGAAGAGATACGCCCTGGTTCCTGGAACAAT<sup>TG</sup>CTTTACAGATGCACATATCGAGGTGAACATCAGTACCGGGAATACTCGAA  
ATGTCCGTTCCGTTGGCAGAAGTATGAACGATATGGGCTGAATACAAT<sup>CAC</sup>AGAATCGTCGATGCAGTGA<sup>AA</sup>ACTCTCTCAATTTCTTTATGC  
CGGTGTTGGCGCGGTTATTTATCGGAGTTCGAGTTGCCCGCGGAACGACATTTATAATGAAGTGAAT<sup>TGC</sup>TCAACAGTATGAACATTTCCGAGCC  
TACCGTAGTGT<sup>TT</sup>GT<sup>TT</sup>CCAAAAGGGGTTGCAAAAATTTTGAACGTGCAAAAAAAT<sup>TAC</sup>CAATAATCCAGAAAAT<sup>TAT</sup>TATCATGGATTTCTAAA  
ACGGATTACCAGGGATTCAGTGCATGTACACGTTCTGTCACATCTCATCTACCTCCCGGTTTTAATGAATACGATTTTGTACCAGAGTCTTTGATC  
GTGACAAAACAAT<sup>TG</sup>CACTGATAATGAAT<sup>CT</sup>CTGGATCTACTGGGTTACCTAAGGGTGTGGCCCTCCGCATAGA<sup>ACT</sup>GCCTGCGTCAGATTTCTC  
GCATGCCAGAGATCCTATTTTGGCAATCAAATCATTCGGATACTCGGATTTAAGTGTGTTCATTTCCATCCATCAGGTTTTGGAATGTTACTACA  
CTCGGATATTTGATATGTGGATTTCCAGTCTCTTAATGTATAGATTTGAAGAAGAGCTGTTTTTACGATCCCTT<sup>CAG</sup>GATTACAAAAT<sup>TCAA</sup>AGTG  
CGTTGCTAGTACCAACCTATTTTCATCTCTCGCCAAAAGCACTCTGATTGACAAAATACGATTTATCTAATTTACACGAAAT<sup>TG</sup>CTTCTGGGGCGC  
ACCTCTTCGAAAGAAGTCGGGAAGCGGTTGCAAAACGCTTCCATCTCCAGGGATACGACAAGGATATGGGCTCACTGAGACTACATCAGCTATT  
CTGATTAACCCGAGGGGATGATAAACCGGGCGCGTCCGTTAAAGTGTTCATTTTGAAGCGAAGTTGTGATCTGGATCCGGATACCGGAAAAACGC  
TGGCGT<sup>TAA</sup>TACAGAGGGCAAT<sup>TAT</sup>GTGTGAGAGGACCTATGAT<sup>TAT</sup>GTCCGGT<sup>TAT</sup>GTAAACAATCCGGAAGCGACCAACGCCTT<sup>GAT</sup>TGACAA  
GGATGGATGGCTACATTTCTGGAGACATAGCTTACTGGGACGAAGACGAACACTTCTT<sup>CAT</sup>AGTTGACCGCTTGAAGTCTTTAAT<sup>TAA</sup>ATACAAAGGA  
TATCAGGTGGCCCGCTGAAT<sup>TG</sup>GAATCGATAT<sup>TGT</sup>TACAACACCCCAACATCTTCGACGCGGGCGTGGCAGGTCTTCCGACGATGACGCCGGTG  
AACTTCCCGCCCGTTGTGT<sup>TT</sup>TGGAGCACGGAAGACGATGACGGA<sup>AAA</sup>AGAGATCGTGGATTCGTCGCCAGTCAAGTAAACCCGCAAAAA  
GTTGCGCGGAGGAGTTGT<sup>TT</sup>TGTGAGCAGTACCGAAAGTCTTACCGGAAAAC<sup>TG</sup>ACGCAAGAAAATCAGAGAGATCTCATAAAGGCCAAG  
AAGGGCGAAAGTCCAAATTTGTAAGCGGCCG
