# Supplementary material for: Gain-of-Signal Assays for Probing Inhibition of SARS-CoV-2 Mpro/3CLpro in Living Cells
Source: PubMed Central journal article supplement (PMC9239272; doi:10.1128/mbio.00784-22), 2022-04-26
Supplement: mbio.00784-22-s0008.pdf [file mbio.00784-22-s0008.pdf]

**Table S1 Inhibitor sources**

| Drug name    | Vendor                          | MW  | Purity | HPLC Trace                                                                                |
|--------------|---------------------------------|-----|--------|-------------------------------------------------------------------------------------------|
| GC376        | Selleckchem<br>S0475            | 508 | ND     | ND                                                                                        |
| Boceprevir   | Selleckchem<br>S3733            | 520 | ND     | ND                                                                                        |
| Nirmatrelvir | MedChemExpress<br>HY-138687     | 500 | ND     | ND                                                                                        |
| GRL-0496     | MedChemExpress<br>HY-137954Data | 273 | ND     | ND                                                                                        |
| Carmofur     | Selleckchem<br>S1289            | 257 | 98%    | <p>DAD1 A, Sig=254.4 Ref=off (CommeHanki 2022-01-24 17-01-13\004-D3F-F3-CBA-Car.D)</p>    |
| Ebselen      | Selleckchem<br>S6676            | 274 | 93%    | <p>DAD1 B, Sig=215.4 Ref=400,40 (CommeHanki 2022-01-24 17-01-13\005-D3F-F4-CBA-Ebs.D)</p> |
| Masitinib    | Selleckchem<br>S1064            | 499 | 98%    | <p>DAD1 B, Sig=215.4 Ref=off (CommeHanki 2022-01-31 12-42-45\002-D3F-F8-CBA-Mas-2.D)</p>  |
| Ethacridine  | Selleckchem<br>S4196            | 343 | 99%    | <p>DAD1 A, Sig=254.4 Ref=off (CommeHanki 2022-01-31 12-42-45\003-D3F-F9-CBA-Eth-2.D)</p>  |
