# Supplementary material for: Gain-of-Signal Assays for Probing Inhibition of SARS-CoV-2 Mpro/3CLpro in Living Cells
Source: PubMed Central journal article supplement (PMC9239272; doi:10.1128/mbio.00784-22), 2022-04-26
Supplement: mbio.00784-22-s0009.pdf [file mbio.00784-22-s0009.pdf]

**Table S2 Site directed mutagenesis and qPCR primers**

| <b>Primer Name</b>             | <b>Sequence</b>                           |
|--------------------------------|-------------------------------------------|
| M <sup>pro</sup> M49D forward  | GCACTAGTGAGGATGACCTTAATCCCAATTACGAAGACC   |
| M <sup>pro</sup> M49D reverse  | GTAATTGGGATTAAGGTCATCTCACTAGTGCAGATTACGTG |
| M <sup>pro</sup> M49I forward  | GCACTAGTGAGGATATTCTTAATCCCAATTACGAAGACC   |
| M <sup>pro</sup> M49I reverse  | GTAATTGGGATTAAGAATATCTCACTAGTGCAGATTACGTG |
| M <sup>pro</sup> P168G forward | GGAACTCGGTACCGGTGTCCACGCCG                |
| M <sup>pro</sup> P168G reverse | GGACACCGGTACCGAGTTCCATATGGTGCATG          |
| M <sup>pro</sup> P168S forward | TGGA ACTCTCAACCGGTGTCCACGC                |
| M <sup>pro</sup> P168S reverse | CACCGGTTGAGAGTTCCATATGGTGCATGTAGC         |
| M <sup>pro</sup> Q189E forward | TGACCGGGAAACCGCGCAAGCG                    |
| M <sup>pro</sup> Q189E reverse | TTGCGCGGTTTCCCGGTCAACGAAC                 |
| M <sup>pro</sup> Q189N forward | TGACCGGAACACCGCGCAAGCG                    |
| M <sup>pro</sup> Q189N reverse | TTGCGCGGTGTTCCCGGTCAACGAAC                |
| M <sup>pro</sup> H41A forward  | CCCCGAGCGGCAATCTGCACTAGTGAGGATATGC        |
| M <sup>pro</sup> H41A reverse  | GCCCCCGAGCGGTAATCTGCACTAGTGAGGATATGC      |
| M <sup>pro</sup> S10A forward  | AGTGCAGATTACCGCTCGGGGGCAGTAGACTACG        |
| M <sup>pro</sup> S10A reverse  | CTTCAACTTTACCTGCGGGGAACGCCATTTTCTAAAACC   |
| M <sup>pro</sup> E14A forward  | CGGTAAAGTTGCAGGATGTATGGTCCAAGTAACC        |
| M <sup>pro</sup> E14A reverse  | ACCATACATCCTGCAACTTTACCGCTGG              |
| M <sup>pro</sup> E290A forward | TCCTCGAAGATGCCTTTACTCCATTTGACGTGGTCAG     |
| M <sup>pro</sup> E290A reverse | AAATGGAGTAAAGGCATCTTCGAGGAGTGCG           |
| M <sup>pro</sup> qPCR forward  | GCTCAAAGTCGATACTGCAAAC                    |
| M <sup>pro</sup> qPCR reverse  | GCTTCCATTATAGCAAGCCAATAC                  |
| Luc qPCR forward               | GCTATGAAGAGATACGCCCTG                     |
| Luc qPCR reverse               | TAGCTTCTGCCAACCGAAC                       |
