# Supplementary material for: Gain-of-Signal Assays for Probing Inhibition of SARS-CoV-2 Mpro/3CLpro in Living Cells
Source: PubMed Central journal article supplement (PMC9239272; doi:10.1128/mbio.00784-22), 2022-04-26
Supplement: mbio.00784-22-s0010.pdf [file mbio.00784-22-s0010.pdf]

**Table S3 X-ray data collection and model refinement statistics**

| M <sup>Pro</sup> /GC376 (7tgr)            |                            |
|-------------------------------------------|----------------------------|
| <hr/> Data collection <hr/>               |                            |
| Resolution range (Å)                      | 47.85 - 1.68 (1.72 - 1.68) |
| Space group                               | C2                         |
| Unit cell                                 |                            |
| ( <i>a</i> , <i>b</i> , <i>c</i> in Å)    | 114.56, 52.94, 45.90       |
| ( $\alpha$ , $\beta$ , $\gamma$ in °)     | 90, 102.551, 90            |
| Total reflections                         | 111667 (7620)              |
| Unique reflections                        | 30122 (1993)               |
| Multiplicity                              | 3.7 (3.8)                  |
| Completeness (%)                          | 97.44 (96.19)              |
| Mean <i>I</i> / $\sigma$ ( <i>I</i> )     | 11.36 (1.06)               |
| <i>R</i> <sub>merge</sub>                 | 0.0636 (1.23)              |
| <i>R</i> <sub>meas</sub>                  | 0.0744 (1.43)              |
| <i>R</i> <sub>pim</sub>                   | 0.0382 (0.719)             |
| CC <sub>1/2</sub>                         | 0.998 (0.526)              |
| <hr/> Refinement <hr/>                    |                            |
| No. of Reflections                        | 29949 (1992)               |
| No. of Refl. for <i>R</i> <sub>free</sub> | 1505 (94)                  |
| <i>R</i> <sub>work</sub>                  | 0.179 (0.323)              |
| <i>R</i> <sub>free</sub>                  | 0.228 (0.347)              |
| Number of non-H atoms                     |                            |
| Macromolecules                            | 2406                       |
| Ligands                                   | 20                         |
| Solvent                                   | 167                        |
| Average B-factor (Å <sup>2</sup> )        |                            |
| Macromolecules                            | 39.03                      |
| Ligands                                   | 38.54                      |
| Solvent                                   | 53.84                      |
| Protein residues                          | 45.66                      |
| Protein residues                          | 305                        |
| R.m.s.d.                                  |                            |
| Bond length (Å)                           | 0.018                      |
| Bond angles (°)                           | 1.57                       |
| Ramachandran plot                         |                            |
| Favored (%)                               | 98.01                      |
| Allowed (%)                               | 1.99                       |
| Outliers (%)                              | 0.00                       |

Statistics for the highest-resolution shell are shown in parentheses.
